## Adaptive Support Ventilation: An Inappropriate Mechanical Ventilation Strategy for Acute Respiratory Distress Syndrome?

To the Editor:

Adaptive support ventilation (ASV) allows clinicians to set a maximum plateau pressure (PP) and a desired minute ventilation. Thus, ASV automatically determines the respiratory rate and tidal volume ( $V_T$ ) based on its algorithms and hereto adjusts  $V_T$  to keep PP below the set maximum. In a lung model with varying mechanics, all mimicking acute respiratory distress syndrome (ARDS), Sulemanji *et al.*<sup>1</sup> compared ASV with conventional mechanical ventilation with a fixed  $V_T$  of 6 ml/kg. Maximum airway pressure limit was 28 cm H<sub>2</sub>O in ASV. The major finding was that ASV “sacrifices”  $V_T$  and minute ventilation to maintain PP in some scenarios (*i.e.*,  $V_T$  was <6 ml/kg, and minute ventilation was lower than desired). As such, ASV seems a safe mode of mechanical ventilation. However, their results also suggest that ASV may be unsafe in other scenarios. Indeed, although median-delivered  $V_T$  was similar with ASV compared with conventional mechanical ventilation with a fixed  $V_T$  of 6 ml/kg (6.27 *vs.* 6.08 ml/kg in the 60-kg group and 5.24 *vs.* 6.13 ml/kg in the 80-kg group), in certain scenarios, maximum-delivered  $V_T$  could be as high as 9.0 and 8.3 ml/kg in the 60-kg group and the 80-kg group, respectively. Such large  $V_T$  can and should never be seen as safe.

The commonly held view that large  $V_T$  ventilation may be tolerated as long as the PP remains at less than 30–35 cm H<sub>2</sub>O has been questioned in a secondary analysis of the landmark study on lung-protective lower  $V_T$  ventilation by the ARDS Network.<sup>2</sup> To assess for independent effects of  $V_T$  reduction on mortality, Hager *et al.*<sup>3</sup> constructed a multivariable logistic regression model. For this, the study groups were stratified by quartiles of PP. Hager *et al.* identified groups of patients who would have had similar PP had they been randomized to the same  $V_T$  strategy. The lower  $V_T$  strategy was associated with a lower mortality than the traditional  $V_T$  strategy in all PP quartiles. From this, we conclude that the beneficial effect of  $V_T$  reduction from 12 to 6 ml/kg is independent of PP.

The same may apply for patients at risk for ARDS. Gajic *et al.*<sup>4</sup> reported significant variability in the initial  $V_T$  settings in mechanically ventilated patients without acute lung injury or ARDS at the onset of mechanical ventilation. Of the patients ventilated for more than 5 days, 25% developed lung injury within 5 days of mechanical ventilation. In this study, the main risk factors associated with the development of lung injury were the use of large  $V_T$ , next to transfusion of blood products, acidemia, and a history of restrictive lung disease. The odds ratio of developing lung injury was 1.3 for each milliliter of  $V_T$  above 6 ml/kg.

In this context, we would like to stress that the terminology chosen for lung-protective mechanical ventilation (using lower  $V_T$ ) is wrong and maybe even misleading. Instead of “lower”  $V_T$ , we should use the term “normal” or “normally sized”  $V_T$ . Let us compare “traffic speeding” with lung-injurious forms of mechanical ventilation: traffic speeding (using too high  $V_T$ ) during “rush hours” (ARDS) is dangerous, but traffic speeding (using too high  $V_T$ ) may always be dangerous, even when there are not so many other cars on the road (no ARDS); therefore, regulations (guidelines) mandate that we should drive not faster than the speed limit (6 ml/kg). “Sacrificing” lower  $V_T$  with mechanical ventilation may be dangerous.

**Dave A. Dongelmans, M.D., M.Sc.,\* Marcus J. Schultz, M.D., Ph.D.** \*Academic Medical Center, University of Amsterdam, Amsterdam, The Netherlands. d.a.dongelmans@amc.uva.nl

### References

1. Sulemanji D, Marchese A, Garbarini P, Wysocki M, Kacmarek RM: Adaptive support ventilation: An appropriate mechanical ventilation strategy for acute respiratory distress syndrome? *ANESTHESIOLOGY* 2009; 111:863–70
2. Ventilation with lower tidal volumes as compared with traditional tidal volumes for acute lung injury and the acute respiratory distress syndrome. The Acute Respiratory Distress Syndrome Network. *N Engl J Med* 2000; 342:1301–8
3. Hager DN, Fessler HE, Kaczka DW, Shanholtz CB, Fuld MK, Simon BA, Brower RG: Tidal volume delivery during high-frequency oscillatory ventilation in adults with acute respiratory distress syndrome. *Crit Care Med* 2007; 35:1522–9
4. Gajic O, Dara SI, Mendez JL, Adesanya AO, Festic E, Caples SM, Rana R, St Sauver JL, Lymp JF, Afessa B, Hubmayr RD: Ventilator-associated lung injury in patients without acute lung injury at the onset of mechanical ventilation. *Crit Care Med* 2004; 32:1817–24

(Accepted for publication January 26, 2010.)

### In Reply:

We thank Drs. Dongelmans and Schultz for their letter expressing interest in our recent publication on adaptive support ventilation (ASV).<sup>1</sup> They correctly describe how ASV works but indicate that the ability of ASV to vary tidal volume in response to a changing clinical presentation is of concern especially if the tidal volume is allowed to exceed 6 ml/kg.

First, it is important to remember that the tidal volumes used by the Acute Respiratory Distress Syndrome Network<sup>2</sup> in its landmark study varied between 4 and 8 ml/kg. Indeed, as we showed in our study, even though the average tidal volume delivered to patients in the low-tidal volume arm was about 6 ml/kg, tidal volume did vary between 4 and 8 ml/kg in many patients.

We believe that allowing tidal volume to increase while keeping plateau pressure at a minimum setting (<28 cm H<sub>2</sub>O in our study) is the major concern of Drs. Dongelmans and Schultz, and they reference Hager *et al.*<sup>3</sup> to demonstrate their point. However, they failed to acknowledge the subse-
